# Supplementary material for: Reactive Oxygen Species (ROS) Generation Is Indispensable for Haustorium Formation of the Root Parasitic Plant Striga hermonthica
Source: PubMed Central journal article supplement (PMC6438919; doi:10.3389/fpls.2019.00328), 2019-03-22
Supplement: Data_Sheet_1.pdf [file Data_Sheet_1.pdf]

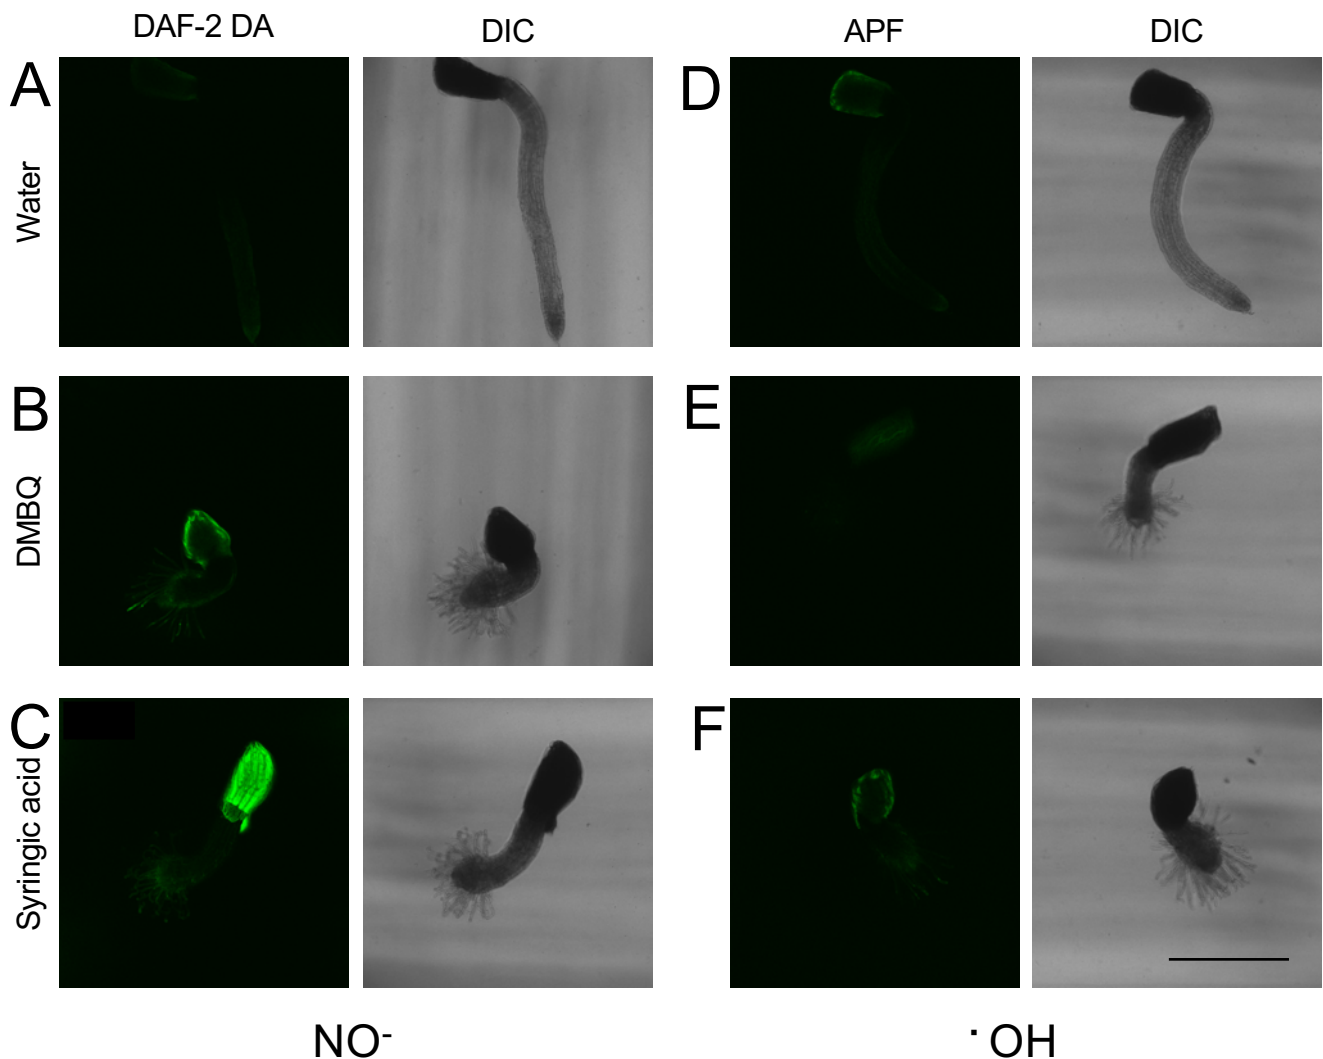

### Supplementary Figure S1 Visualization of $\text{NO}\cdot$ and $\cdot\text{OH}$

For visualization of  $\text{NO}\cdot$  (A-C) and  $\cdot\text{OH}$  (D-F), haustoria of *S. hermonthica* induced by 10  $\mu\text{M}$  DMBQ (B and E) or syringic acid (C and F) for 24 h were stained with 10  $\mu\text{M}$  DAF-2 DA (A-C) or 10  $\mu\text{M}$  APF (D-F) for 30 min. Radicals grown in water (A, D) were observed as a control. Left and right panels show confocal microscope images and DIC images, respectively. The scale bar indicates 500  $\mu\text{m}$ .

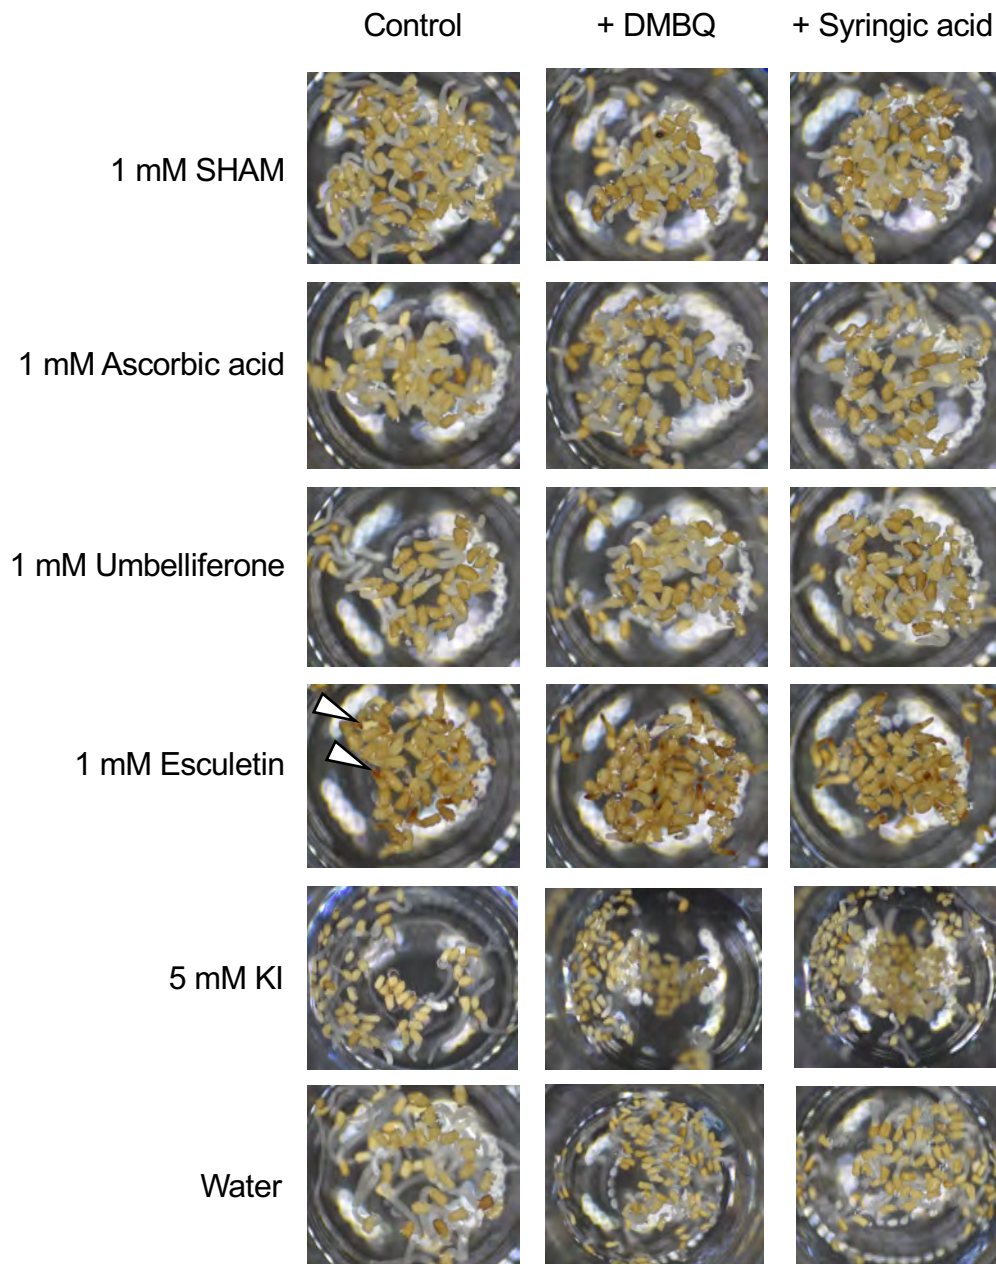

**Supplementary Figure S2 Images of *S. hermonthica* seedlings treated with ROS inhibitors and DMBQ or syringic acid**

Germinated *S. hermonthica* seedlings were exposed to each inhibitor at indicated concentrations with or without (control) 10  $\mu$ M DMBQ or syringic acid and observed after 24 h of treatment. White arrowheads indicate brownish radicle tip by high concentration of esculetin treatment.

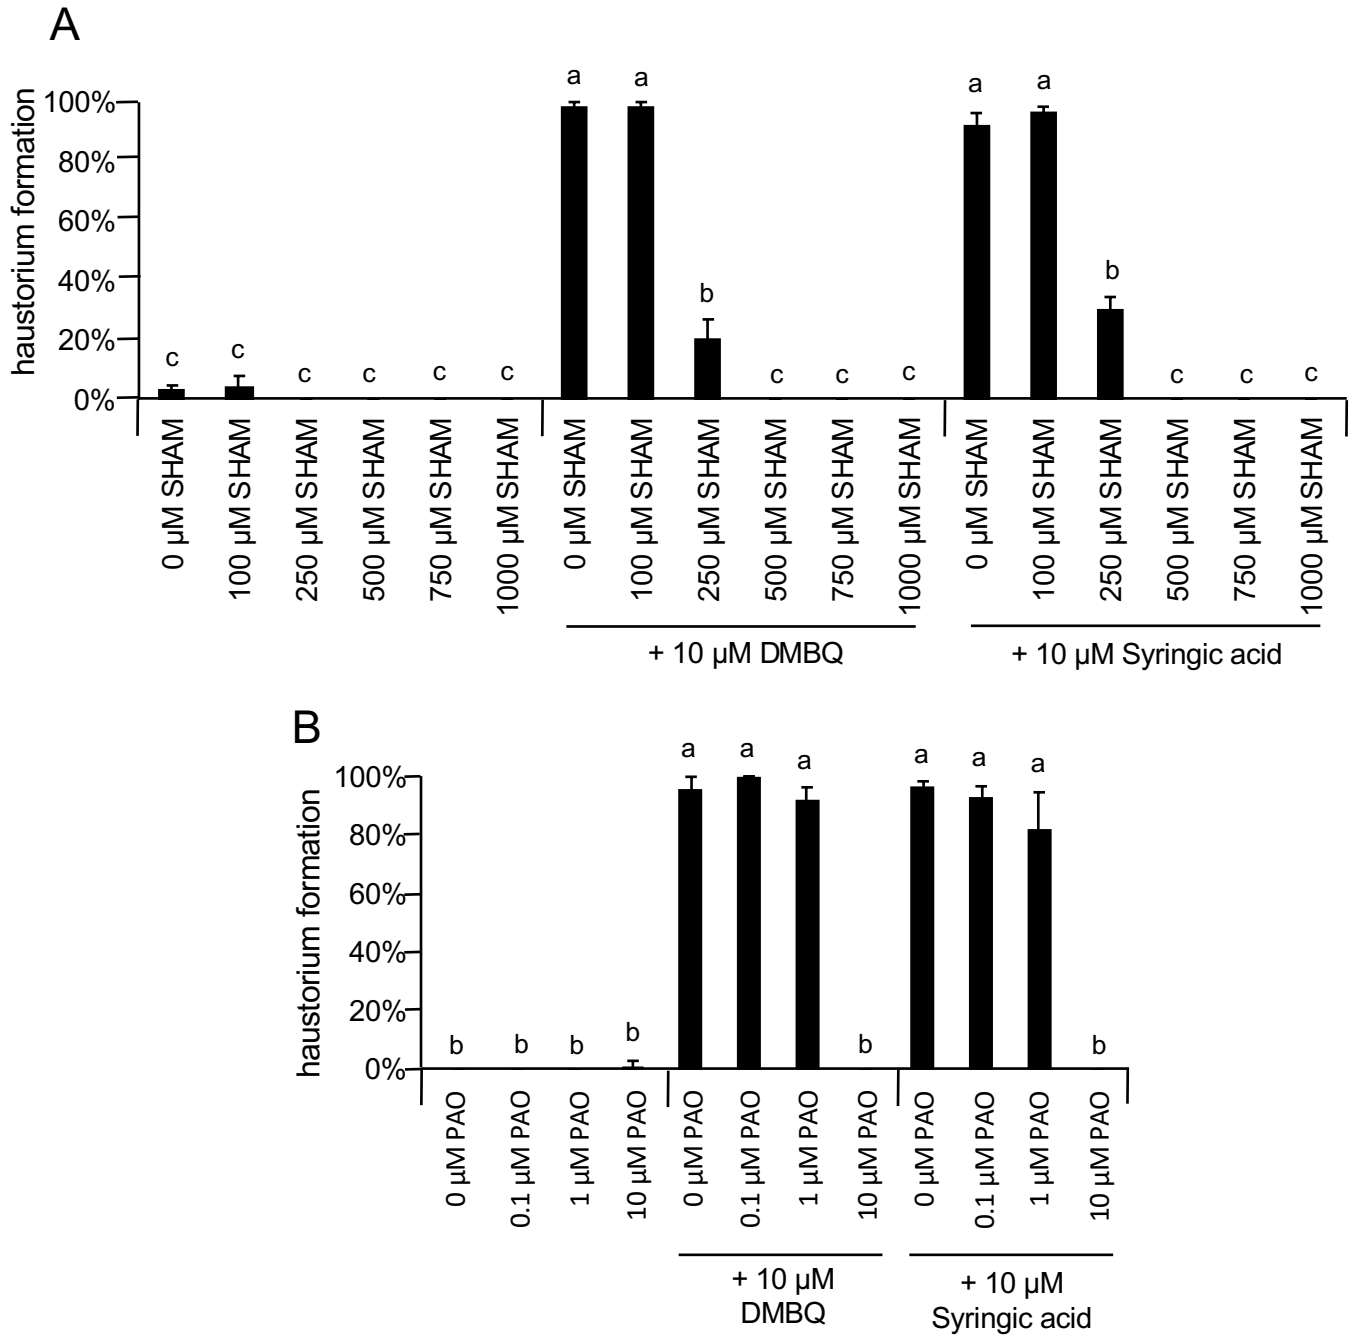

**Supplementary Figure S3 Effects of SHAM and PAO on haustorium formation**

(A) Concentration-dependent inhibition of SHAM on haustorium formation induced by DMBQ or syringic acid. (B) Effect of PAO on haustorium induction by DMBQ or syringic acid. Error bars indicate SE (n = 3), and NT = not tested. Different lower-case letters represent significant differences as determined by a Tukey HSD test (p < 0.05).

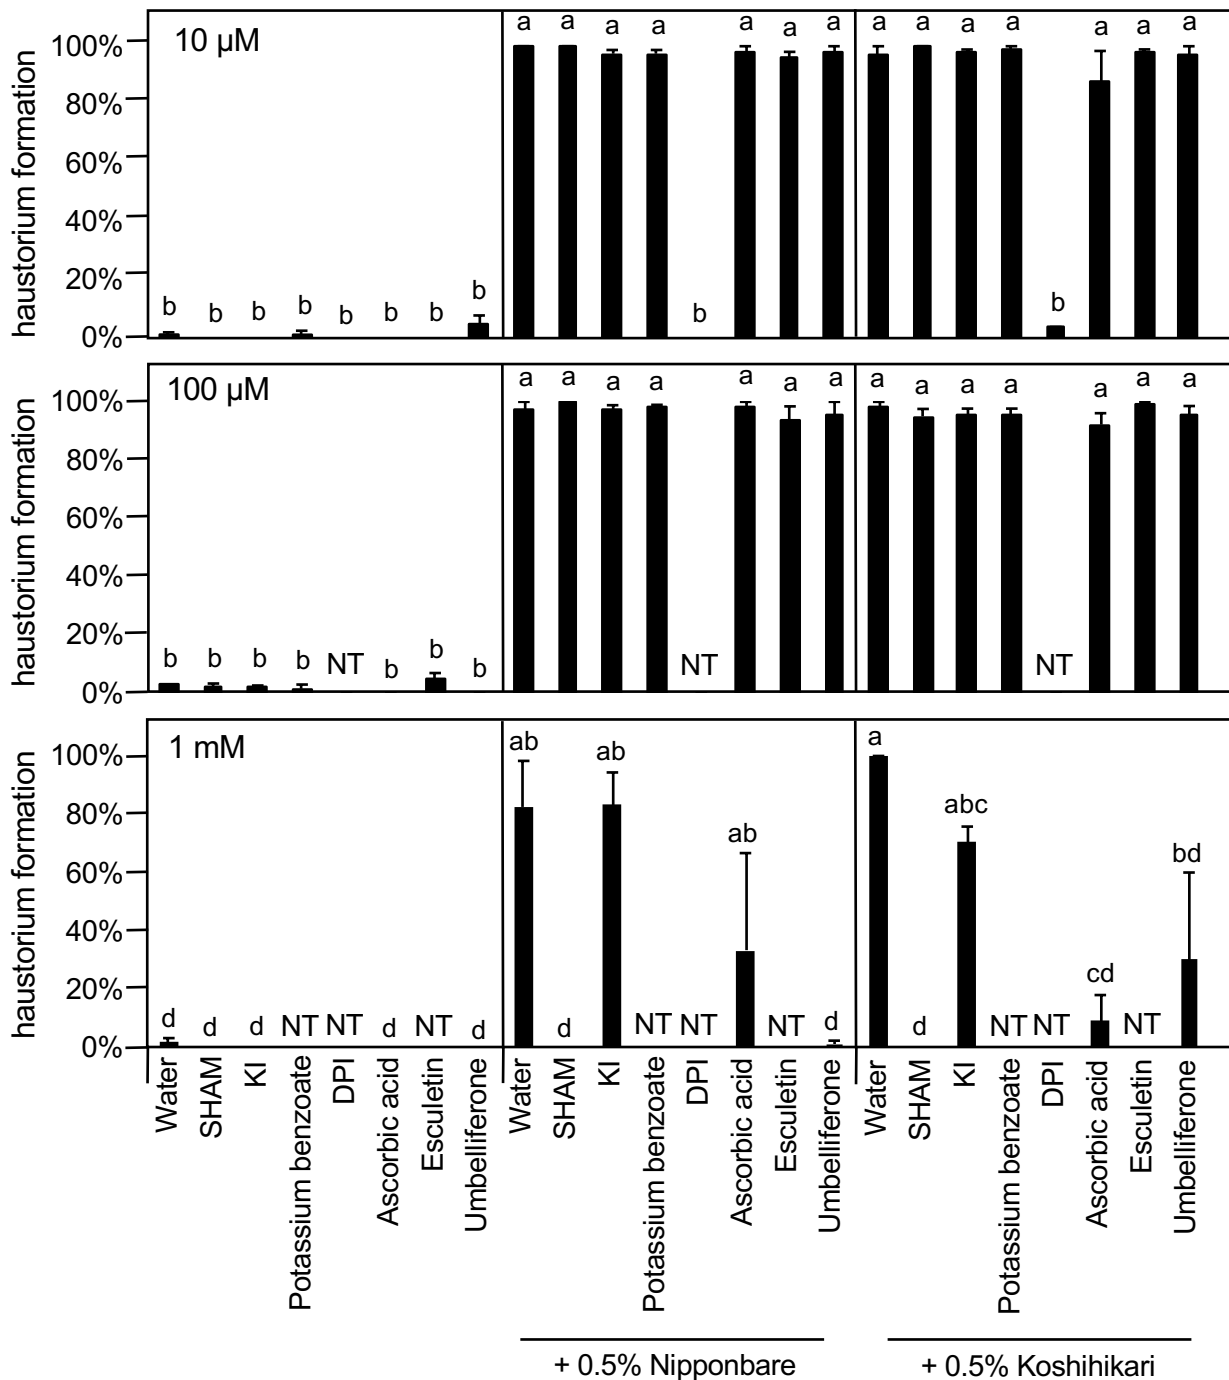

**Supplementary Figure S4 Effects of ROS inhibitors on haustorium formation induced by rice root extracts**

Haustorium formation rates were calculated after *S. hermonthica* seedlings were treated with 0.5 % root extracts from cultivars Nipponbare and Koshihikari in the absence or presence of various ROS inhibitors. The concentration of each chemical is shown at the top left of each graph. Error bars indicate SE (n = 3), and NT = not tested. Different lower-case letters represent significant differences as determined by a Tukey HSD test (p < 0.05).

Supplementary Table S1. Chemicals used in this study

| Chemical name                           | Company                            | Stock concentration   | Role                           |
|-----------------------------------------|------------------------------------|-----------------------|--------------------------------|
| Strigol                                 | -                                  | 10 $\mu$ M in acetone | Induction of germination       |
| 2,6-dimethoxy-1,4-benzoquinone (DMBQ)   | Sigma-Aldrich                      | 10 mM in DMSO         | Haustorium inducing factor     |
| Syringic acid                           | Sigma-Aldrich                      | 10 mM in DMSO         | Haustorium inducing factor     |
| Salicylhydroxamic acid (SHAM)           | Tokyo Chemical Industry Co., Ltd   | 10 mM in DMSO         | Peroxidase inhibitor           |
|                                         |                                    | 100 mM in DMSO        |                                |
| Potassium iodide (KI)                   | Wako Pure Chemical Industries, Ltd | 10 mM in DMSO         | Hydrogen peroxide scavenger    |
|                                         |                                    | 100 mM in DMSO        |                                |
|                                         |                                    | 100 mM in water       |                                |
| Potassium benzoate                      | Wako Pure Chemical Industries, Ltd | 10 mM in DMSO         | Scavenger of hydroxyl radicals |
| Diphenyleneiodonium (DPI)               | Funakoshi Frontiers Life Science   | 10 mM in DMSO         | NADPH oxidase inhibitor        |
| L-ascorbic acid                         | Wako Pure Chemical Industries, Ltd | 10 mM in DMSO         | Scavenger of radical species   |
|                                         |                                    | 100 mM in DMSO        |                                |
| Umbelliferone                           | Tokyo Chemical Industry Co., Ltd   | 10 mM in DMSO         | Peroxidase modulator           |
|                                         |                                    | 100 mM in DMSO        |                                |
| 6,7-dihydroxycoumarin (Esculetin)       | Sigma-Aldrich                      | 10 mM in DMSO         | Peroxidase modulator           |
| Phenylarsine oxide (PAO)                | Sigma-Aldrich                      | 10 mM in DMSO         | NADPH oxidase inhibitor        |
| Diethyldithiocarbamate trihydrate (DDC) | Sigma-Aldrich                      | 10 mM in DMSO         | SOD inhibitor                  |
